# Supplementary material for: The Composition of Hyperacute Serum and Platelet-Rich Plasma Is Markedly Different despite the Similar Production Method
Source: PubMed Central journal article supplement (PMC6386965; doi:10.3390/ijms20030721), 2019-02-08
Supplement: ijms-20-00721-s001.pdf [file ijms-20-00721-s001.pdf]

## Supplementary materials

Table S1.

| Abbreviation of the proteins | Name of the proteins                                             | Protein level (AU) % |       |       |        |
|------------------------------|------------------------------------------------------------------|----------------------|-------|-------|--------|
|                              |                                                                  | PRP                  | HAS   | Serum | Plasma |
| Activin A                    | Activin A                                                        | 1.63                 | 1.37  | 2.17  | 2.60   |
| ADAMTS-1                     | A disintegrin and metalloproteinase with thrombospondin motifs 1 | 0.10                 | 0.00  | 0.00  | 0.00   |
| Adiponectin                  | Adiponectin                                                      | 13.16                | 15.41 | 8.07  | 8.49   |
| ACN                          | Aggrecan                                                         | 11.48                | 10.38 | 4.93  | 5.49   |
| ANG                          | Angiogenin                                                       | 37.28                | 22.26 | 19.65 | 20.73  |
| Ang-1                        | Angiogenin-1                                                     | 4.95                 | 2.39  | 14.26 | 0.30   |
| Ang-2                        | Angiogenin-2                                                     | 0.30                 | 0.03  | 0.00  | 0.05   |
| ANGPT1                       | Angiopoietin-1                                                   | 5.05                 | 2.98  | 0.95  | 0.31   |
| ANGPT2                       | Angiopoietin-2                                                   | 0.00                 | 0.37  | 0.04  | 0.14   |
| Angiostatin/Plasminogen      | Angiostatin/Plasminogen                                          | 0.64                 | 0.29  | 0.32  | 0.72   |
| AR                           | Androgen receptor                                                | 0.00                 | 0.00  | 0.00  | 0.02   |
| Artemin                      | Artemin                                                          | 0.03                 | 0.00  | 0.01  | 0.00   |
| Average Reference Spots      | Average Reference Spots                                          | 16.08                | 16.08 | 16.08 | 16.08  |
| BAFF                         | B-cell activating factor                                         | 6.95                 | 6.70  | 1.67  | 1.61   |
| BDNF                         | Brain-derived neurotrophic factor                                | 15.89                | 0.62  | 1.40  | 0.24   |
| C5/C5a                       | Complement component 5/Complement component 5a                   | 8.01                 | 5.88  | 0.74  | 0.35   |
| CD14                         | Cluster of differentiation 14                                    | 7.88                 | 3.85  | 0.56  | 0.43   |
| CD30                         | Cluster of differentiation 30                                    | 0.00                 | 0.28  | 0.18  | 0.13   |
| CD40 Ligand/TNFSF5           | Cluster of differentiation 4 Ligand                              | 5.40                 | 1.26  | 0.28  | 0.17   |
| CFD                          | Complement factor D                                              | 11.62                | 13.33 | 6.49  | 6.52   |
| CHI3L1                       | Chitinase 3-like protein 1                                       | 15.52                | 17.37 | 13.43 | 13.81  |
| Cripto-1                     | Epidermal growth factor-Cripto-FRL1-Cryptic                      | 0.00                 | 0.35  | 0.15  | 0.21   |
| CRP                          | C-reactive protein                                               | 14.42                | 18.43 | 11.92 | 14.17  |
| CXCL16                       | Chemokine (C-X-C motif) ligand 16                                | 19.84                | 13.25 | 11.86 | 13.03  |
| Cystatin C                   | Cystatin C                                                       | 9.96                 | 8.58  | 2.93  | 2.30   |
| Dkk-1                        | Dickkopf-related protein 1                                       | 11.76                | 0.97  | 0.24  | 0.11   |
| DPPIV                        | Dipeptidyl peptidase IV.                                         | 14.90                | 9.58  | 11.14 | 11.88  |
| EGF                          | Epidermal growth factor                                          | 12.83                | 0.37  | 0.08  | 0.17   |
| EG-VEGF                      | Endocrine-gland-derived vascular endothelial growth factor       | 0.00                 | 0.06  | 0.01  | 0.01   |
| EMMPRIN                      | Expression of extracellular matrix metalloproteinase inducer     | 13.56                | 8.74  | 3.05  | 3.82   |
| ENA-78                       | Epithelial cell-derived neutrophil-activating peptide 78         | 12.36                | 7.98  | 0.94  | 0.88   |
| ENG                          | Endoglin                                                         | 10.99                | 11.43 | 4.38  | 4.32   |
| Endostatin/Collagen XVIII    | Endostatin/Collagen XVIII                                        | 0.75                 | 4.86  | 6.54  | 10.11  |
| ET-1                         | Endothelin-1                                                     | 0.00                 | 0.05  | 0.00  | 0.09   |
| FASL                         | Fas Ligand                                                       | 0.00                 | 0.70  | 0.15  | 0.40   |
| FGF basic                    | Fibroblast growth factor basic                                   | 0.00                 | 1.96  | 0.32  | 0.59   |

|                                              |                                                              |       |       |       |       |
|----------------------------------------------|--------------------------------------------------------------|-------|-------|-------|-------|
| <b>FGF-1</b>                                 | Fibroblast growth factor 1                                   | 0.13  | 0.02  | 0.00  | 0.08  |
| <b>FGF-19</b>                                | Fibroblast growth factor 19                                  | 3.49  | 1.00  | 0.23  | 0.11  |
| <b>FGF-2</b>                                 | Fibroblast growth factor 2                                   | 0.00  | 0.00  | 0.00  | 0.00  |
| <b>FGF-4</b>                                 | Fibroblast growth factor 4                                   | 0.00  | 0.02  | 0.00  | 0.00  |
| <b>FGF-7</b>                                 | Fibroblast growth factor 7                                   | 0.07  | 0.01  | 0.00  | 0.03  |
| <b>FLT3L</b>                                 | FMS-like tyrosine kinase 3 ligand                            | 0.00  | 0.34  | 0.02  | 0.00  |
| <b>G-CSF</b>                                 | Granulocyte colony-stimulating factor                        | 0.00  | 0.40  | 0.00  | 0.05  |
| <b>GDF-15</b>                                | Growth differentiation factor 15                             | 3.87  | 1.89  | 0.01  | 0.37  |
| <b>GDNF</b>                                  | Glial cell line-derived neurotrophic factor                  | 0.00  | 0.00  | 0.00  | 0.00  |
| <b>GH</b>                                    | Growth hormone                                               | 0.00  | 0.04  | 0.01  | 0.04  |
| <b>GM-CSF</b>                                | Granulocyte-macrophage colony-stimulating factor             | 0.00  | 0.04  | 0.00  | 0.01  |
| <b>CXCL-1/GRO-a</b>                          | Hemokine (C-X-C motif) ligand/Growth-regulated alpha protein | 3.40  | 0.08  | 0.02  | 0.00  |
| <b>HB-EGF</b>                                | Heparin binding EGF-like growth factor                       | 6.58  | 0.06  | 0.17  | 0.00  |
| <b>HGF</b>                                   | Hepatocyte growth factor                                     | 0.05  | 0.00  | 0.00  | 0.00  |
| <b>ICAM-1</b>                                | Intercellular Adhesion Molecule 1                            | 6.57  | 4.22  | 0.39  | 0.53  |
| <b>IFN<math>\gamma</math></b>                | Interferon gamma                                             | 0.00  | 0.16  | 0.03  | 0.03  |
| <b>IGFBP-1</b>                               | Insulin-like growth factor-binding protein 1                 | 37.07 | 14.55 | 13.95 | 14.53 |
| <b>IGFBP-2</b>                               | Insulin-like growth factor-binding protein 2                 | 18.65 | 9.23  | 10.56 | 13.11 |
| <b>IGFBP-3</b>                               | Insulin-like growth factor-binding protein 2                 | 25.27 | 16.14 | 14.33 | 16.55 |
| <b>IL-10</b>                                 | Interleukine 10                                              | 0.00  | 0.00  | 0.02  | 0.03  |
| <b>IL-11</b>                                 | Interleukine 11                                              | 0.00  | 0.61  | 0.00  | 0.06  |
| <b>IL-12 p70</b>                             | Interleukine 12                                              | 0.00  | 0.42  | 0.03  | 0.02  |
| <b>IL-13</b>                                 | Interleukine 13                                              | 0.00  | 0.09  | 0.03  | 0.02  |
| <b>IL-15</b>                                 | Interleukine 15                                              | 0.00  | 0.05  | 0.00  | 0.00  |
| <b>IL-16</b>                                 | Interleukine 16                                              | 4.12  | 0.06  | 0.09  | 0.01  |
| <b>IL-17a</b>                                | Interleukine 17                                              | 2.79  | 1.07  | 0.06  | 0.21  |
| <b>IL-18 Bpa</b>                             | Interleukine 18                                              | 1.61  | 1.18  | 0.02  | 0.04  |
| <b>IL-19</b>                                 | Interleukine 19                                              | 2.57  | 0.00  | 0.03  | 0.04  |
| <b>IL-1<math>\alpha</math></b>               | Interleukine 1 alpha                                         | 0.00  | 0.22  | 0.00  | 0.04  |
| <b>IL-1<math>\beta</math></b>                | Interleukine 1 beta                                          | 0.00  | 0.00  | 0.00  | 0.00  |
| <b>IL-1RA</b>                                | Interleukine 1 receptor antagonist                           | 9.47  | 0.25  | 0.01  | 0.00  |
| <b>IL-2</b>                                  | Interleukine 2                                               | 0.00  | 0.09  | 0.00  | 0.00  |
| <b>IL-22</b>                                 | Interleukine 22                                              | 0.00  | 0.07  | 0.02  | 0.01  |
| <b>IL-23</b>                                 | Interleukine 23                                              | 0.00  | 0.19  | 0.00  | 0.05  |
| <b>IL-24</b>                                 | Interleukine 24                                              | 0.00  | 0.10  | 0.10  | 0.00  |
| <b>IL-3</b>                                  | Interleukine 3                                               | 1.12  | 0.00  | 0.00  | 0.00  |
| <b>IL-31</b>                                 | Interleukine 31                                              | 0.00  | 0.00  | 0.01  | 0.07  |
| <b>IL-32<math>\alpha/\beta/\gamma</math></b> | Interleukine 32                                              | 0.00  | 0.05  | 0.09  | 0.00  |
| <b>IL-33</b>                                 | Interleukine 33                                              | 0.00  | 0.01  | 0.02  | 0.05  |
| <b>IL-34</b>                                 | Interleukine 34                                              | 0.00  | 0.15  | 0.02  | 0.03  |
| <b>IL-37</b>                                 | Interleukine 37                                              | 0.00  | 0.14  | 0.00  | 0.07  |
| <b>IL-4</b>                                  | Interleukine 4                                               | 0.00  | 0.00  | 0.01  | 0.00  |
| <b>IL-5</b>                                  | Interleukine 5                                               | 0.00  | 0.16  | 0.02  | 0.00  |
| <b>IL-6</b>                                  | Interleukine 6                                               | 0.00  | 0.04  | 0.00  | 0.13  |
| <b>IL-8</b>                                  | Interleukine 8                                               | 0.07  | 0.00  | 0.00  | 0.04  |

|                                         |                                                                                                                                                                                          |       |       |       |       |
|-----------------------------------------|------------------------------------------------------------------------------------------------------------------------------------------------------------------------------------------|-------|-------|-------|-------|
| <b>IP-40</b>                            | Interferon gamma inducible protein 40                                                                                                                                                    | 6.21  | 1.09  | 0.09  | 0.08  |
| <b>I-TAC/CXCL-11</b>                    | Interferon-inducible T-cell alpha chemoattractant/<br>Chemokine (C-X-C motif) ligand 11                                                                                                  | 0.00  | 0.10  | 0.00  | 0.02  |
| <b>KLK3</b>                             | kallikrein related peptidase 3                                                                                                                                                           | 4.27  | 0.81  | 0.09  | 0.00  |
| <b>LAP(TGF-<math>\beta</math>1)</b>     | Latency-associated peptide (Transforming growth factor beta 1)                                                                                                                           | 25.20 | 0.00  | 0.02  | 0.00  |
| <b>Leptin</b>                           | Leptin                                                                                                                                                                                   | 13.13 | 12.66 | 13.53 | 13.74 |
| <b>LIF</b>                              | Leukemia inhibitory factor                                                                                                                                                               | 0.00  | 0.04  | 0.00  | 0.00  |
| <b>LCN2</b>                             | Lipocalin-2                                                                                                                                                                              | 12.07 | 13.31 | 8.43  | 5.35  |
| <b>MCP-1/CCL-2</b>                      | Monocyte chemoattractant protein-1/C-C motif chemokine ligand 2                                                                                                                          | 0.00  | 0.00  | 0.00  | 0.01  |
| <b>MCP-3/CCL-7</b>                      | Monocyte chemoattractant protein-3/C-C motif chemokine ligand 7                                                                                                                          | 0.00  | 0.07  | 0.05  | 0.00  |
| <b>M-CSF</b>                            | Macrophage colony-stimulating factor                                                                                                                                                     | 0.00  | 0.01  | 0.02  | 0.00  |
| <b>MIF</b>                              | Macrophage migration inhibitory factor                                                                                                                                                   | 8.23  | 4.17  | 0.74  | 0.68  |
| <b>CXCL-9/MIG</b>                       | Monokine induced by gamma/ Chemokine (C-X-C motif) ligand 9                                                                                                                              | 0.00  | 0.10  | 0.01  | 0.00  |
| <b>CCL-3/MIP-1<math>\alpha</math></b>   | Chemokine (C-C motif) ligand 3/ macrophage inflammatory protein 1-alpha                                                                                                                  | 0.07  | 0.01  | 0.04  | 0.07  |
| <b>MIP-1<math>\alpha</math> (CCL-4)</b> | <b>(CCL-3)/MIP-1<math>\beta</math></b><br>Chemokine (C-C motif) ligand 3/ macrophage inflammatory protein 1-alpha/Chemokine (C-C motif) ligand 4/ macrophage inflammatory protein 1-beta | 0.00  | 0.00  | 0.25  | 0.07  |
| <b>MIP-3<math>\alpha</math>/CCL-20</b>  | Chemokine (C-C motif) ligand 20/ macrophage inflammatory protein 3-alpha                                                                                                                 | 0.00  | 0.00  | 0.00  | 0.00  |
| <b>MIP-3<math>\beta</math>/CCL-19</b>   | Chemokine (C-C motif) ligand 19/ macrophage inflammatory protein 3-alpha                                                                                                                 | 0.00  | 0.50  | 0.06  | 0.03  |
| <b>MMP-8</b>                            | Matrix metalloproteinase 8                                                                                                                                                               | 1.96  | 1.50  | 6.06  | 1.39  |
| <b>MMP-9</b>                            | Matrix metalloproteinase 9                                                                                                                                                               | 23.92 | 15.71 | 19.34 | 17.07 |
| <b>MPO</b>                              | Myeloperoxidase                                                                                                                                                                          | 0.00  | 0.34  | 0.03  | 0.06  |
| <b>NRG1-<math>\beta</math>1</b>         | Human Neuregulin-1 beta 1                                                                                                                                                                | 0.00  | 0.00  | 0.04  | 0.00  |
| <b>OPN</b>                              | Osteopontin                                                                                                                                                                              | 6.40  | 1.60  | 0.42  | 0.83  |
| <b>PD-ECGF</b>                          | Platelet-derived endothelial cell growth factor                                                                                                                                          | 0.04  | 0.07  | 0.04  | 0.02  |
| <b>PDGF-AA</b>                          | Platelet-derived growth factor AA                                                                                                                                                        | 16.10 | 13.61 | 15.74 | 6.53  |
| <b>PDGF-AA/AB</b>                       | Platelet-derived growth factor AA/AB                                                                                                                                                     | 16.47 | 12.88 | 12.34 | 2.52  |
| <b>Persephin</b>                        | Persephin                                                                                                                                                                                | 0.04  | 0.05  | 0.00  | 0.00  |
| <b>PF4</b>                              | Platelet factor 4                                                                                                                                                                        | 0.00  | 3.59  | 2.06  | 13.71 |
| <b>PIGF</b>                             | Phosphatidylinositol-glycan biosynthesis class F protein                                                                                                                                 | 0.09  | 0.02  | 0.00  | 0.00  |
| <b>Prolactin</b>                        | Prolactin                                                                                                                                                                                | 16.32 | 9.95  | 12.57 | 11.57 |
| <b>PTX 3</b>                            | Pentraxin-3                                                                                                                                                                              | 6.97  | 1.77  | 4.28  | 3.72  |
| <b>RAGE</b>                             | Receptor for Advanced Glycation Endproducts                                                                                                                                              | 0.00  | 0.46  | 0.09  | 0.26  |
| <b>RANTES/CCL-5</b>                     | Regulated on activation, normal T cell expressed and secreted/Chemokine (C-C motif) ligand 5                                                                                             | 10.07 | 11.29 | 6.50  | 5.43  |
| <b>RBP4</b>                             | Retinol binding protein 4                                                                                                                                                                | 18.21 | 18.20 | 20.90 | 17.71 |
| <b>RLN2</b>                             | Relaxin-2                                                                                                                                                                                | 0.00  | 0.16  | 0.02  | 0.08  |
| <b>Resistin</b>                         | Resistin                                                                                                                                                                                 | 17.56 | 9.42  | 2.50  | 1.68  |
| <b>SDF-1a</b>                           | Stromal cell-derived factor-1                                                                                                                                                            | 5.74  | 1.42  | 0.25  | 0.15  |
| <b>Serpin B5</b>                        | Serpin family B member 5                                                                                                                                                                 | 0.00  | 0.00  | 0.00  | 0.00  |
| <b>Serpin E1</b>                        | Serpin family E member 1                                                                                                                                                                 | 5.14  | 21.37 | 18.32 | 18.01 |

|                                |                                                                           |       |       |       |       |
|--------------------------------|---------------------------------------------------------------------------|-------|-------|-------|-------|
| <b>Serpin F1</b>               | Serpin family F member 1                                                  | 0.05  | 0.00  | 0.01  | 0.04  |
| <b>SHBG</b>                    | Sex hormone binding globulin                                              | 8.31  | 5.60  | 1.80  | 1.86  |
| <b>ST2</b>                     | Suppression of tumorigenicity 2                                           | 6.15  | 4.99  | 1.22  | 1.65  |
| <b>TARC/CCL-17</b>             | Thymus and activation regulated chemokine/Chemokine (C-C motif) ligand 17 | 10.67 | 0.81  | 0.24  | 0.18  |
| <b>TF</b>                      | Transferrin                                                               | 0.00  | 0.00  | 0.00  | 0.09  |
| <b>TFF3</b>                    | Trefoil factor 3                                                          | 8.76  | 5.31  | 1.18  | 1.83  |
| <b>TfR</b>                     | Transferrin Receptor                                                      | 0.00  | 0.69  | 0.28  | 0.30  |
| <b>TGF-<math>\alpha</math></b> | Transforming growth factor alpha                                          | 0.00  | 0.06  | 0.07  | 0.12  |
| <b>THBS1</b>                   | Thrombospondin-1                                                          | 0.00  | 3.49  | 0.92  | 9.63  |
| <b>THBS2</b>                   | Thrombospondin-2                                                          | 0.10  | 0.14  | 0.11  | 0.00  |
| <b>TIMP-1</b>                  | Tissue inhibitor of metalloproteinase 1                                   | 23.13 | 24.26 | 21.31 | 20.46 |
| <b>TIMP-4</b>                  | Tissue inhibitor of metalloproteinase 4                                   | 35.95 | 21.25 | 20.46 | 18.59 |
| <b>TNF-<math>\alpha</math></b> | Tumor necrosis factor alpha                                               | 0.00  | 0.45  | 1.32  | 1.41  |
| <b>Upa</b>                     | Urokinase-type plasminogen activator                                      | 3.83  | 3.48  | 5.37  | 5.33  |
| <b>Upar</b>                    | Urokinase-type plasminogen activator receptor                             | 6.41  | 0.79  | 0.10  | 0.06  |
| <b>VASH1</b>                   | Vasohibin                                                                 | 0.13  | 0.02  | 0.00  | 0.00  |
| <b>VEGF</b>                    | Vascular Endothelial Growth Factor                                        | 11.49 | 1.51  | 5.25  | 1.93  |
| <b>VEGF-C</b>                  | Vascular Endothelial Growth Factor C                                      | 0.03  | 0.00  | 0.00  | 0.00  |
| <b>Vitamin D BP</b>            | Vitamin D binding protein                                                 | 2.87  | 13.27 | 0.00  | 0.13  |
